# Supplementary material
Source: publisher figshare collection journal article supplement (https://frontiersin.figshare.com/ndownloader/files/24645131)
Supplement: Supplementary file [file 24645131]

**Supplementary Supplementary Table 1. Classification for drug related problems**

| Code                                                     | Domains                                                                         | Code  | Problem/ Cause/ Intervention                                                                          |                                                       |                                   |
|----------------------------------------------------------|---------------------------------------------------------------------------------|-------|-------------------------------------------------------------------------------------------------------|-------------------------------------------------------|-----------------------------------|
|                                                          |                                                                                 |       | Original version (V9.0)                                                                               | Modified version for intervention                     | Modified version for consultation |
| Problems (also potential)                                |                                                                                 |       |                                                                                                       |                                                       |                                   |
| P1                                                       | Treatment effectiveness                                                         | P1.1  | No effect of drug treatment                                                                           |                                                       |                                   |
|                                                          | There is a (potential) problem with the (lack of) effect of the pharmacotherapy | P1.2  | Effect of drug treatment not optimal                                                                  |                                                       |                                   |
|                                                          |                                                                                 | P1.3  | Untreated symptoms or indication                                                                      |                                                       |                                   |
| P2                                                       | Treatment safety                                                                | P2.1  | Adverse drug event (possibly) occurring                                                               |                                                       |                                   |
|                                                          | Patient suffers, or could suffer, from an adverse drug event                    |       |                                                                                                       |                                                       |                                   |
| P3 #                                                     | Other                                                                           | P3.1  | Problem with cost-effectiveness of the treatment                                                      |                                                       | Treatment safety and efficacy     |
|                                                          |                                                                                 | P3.2  | Unnecessary drug-treatment                                                                            |                                                       |                                   |
|                                                          |                                                                                 | P3.3* | Unclear problem/complaint. Further clarification necessary                                            | Needs Supplementary drug therapeutic monitoring (TDM) |                                   |
|                                                          |                                                                                 | P3.4* | /                                                                                                     | Antibiotics De-escalation                             |                                   |
| P4 #                                                     | Other                                                                           | /     | /                                                                                                     | /                                                     | Other                             |
| Causes (including possible cases for potential problems) |                                                                                 |       |                                                                                                       |                                                       |                                   |
| C1 #                                                     | Drug selection                                                                  | C1.1  | Inappropriate drug according to guidelines/formulary                                                  |                                                       | Drug/Drug regimen selection       |
|                                                          | The cause of the DRP can be related to the selection of the drug                | C1.2  | Inappropriate drug (within guidelines but otherwise contra-indicated)                                 |                                                       |                                   |
|                                                          |                                                                                 | C1.3  | No indication for drug                                                                                |                                                       |                                   |
|                                                          |                                                                                 | C1.4  | Inappropriate combination of drugs, or drugs and herbal medications, or drugs and dietary supplements |                                                       |                                   |
|                                                          |                                                                                 | C1.5  | Inappropriate duplication of therapeutic group or active ingredient                                   |                                                       |                                   |
|                                                          |                                                                                 | C1.6  | No or incomplete drug treatment in spite of existing indication                                       |                                                       |                                   |

| Code | Domains                                                                                                                                                     | Code   | Problem/ Cause/ Intervention                               |                                   |                                   |
|------|-------------------------------------------------------------------------------------------------------------------------------------------------------------|--------|------------------------------------------------------------|-----------------------------------|-----------------------------------|
|      |                                                                                                                                                             |        | Original version (V9.0)                                    | Modified version for intervention | Modified version for consultation |
|      |                                                                                                                                                             | C1.7   | Too many drugs prescribed for indication                   |                                   |                                   |
|      |                                                                                                                                                             | C1.8 * | / Necessary genetic testing before drug initiation         |                                   |                                   |
| C2   | Drug form<br>The cause of the DRP is related to the selection of the drug form                                                                              | C2.1   | Inappropriate drug form (for this patient)                 |                                   | Drug form                         |
| C3   | Dose selection<br>The cause of the DRP can be related to the selection of the dosage schedule                                                               | C3.1   | Drug dose too low                                          |                                   | Dose selection                    |
|      |                                                                                                                                                             | C3.2   | Drug dose too high                                         |                                   |                                   |
|      |                                                                                                                                                             | C3.3   | Dosage regimen not frequent enough                         |                                   |                                   |
|      |                                                                                                                                                             | C3.4   | Dosage regimen too frequent                                |                                   |                                   |
|      |                                                                                                                                                             | C3.5   | Dose timing instructions wrong, unclear or missing         |                                   |                                   |
| C4   | Treatment duration<br>The cause of the DRP is related to the duration of treatment                                                                          | C4.1   | Duration of treatment too short                            |                                   | Treatment duration                |
|      |                                                                                                                                                             | C4.2   | Duration of treatment too long                             |                                   |                                   |
| C5   | Dispensing<br>The cause of the DRP can be related to the logistics of the prescribing and dispensing process                                                | C5.1   | Prescribed drug not available                              |                                   | Dispensing                        |
|      |                                                                                                                                                             | C5.2   | Necessary information not provided                         |                                   |                                   |
|      |                                                                                                                                                             | C5.3   | Wrong drug, strength or dosage advised (OTC)               |                                   |                                   |
|      |                                                                                                                                                             | C5.4   | Wrong drug or strength dispensed                           |                                   |                                   |
| C6   | Drug use process<br>The cause of the DRP is related to the way the patient gets the drug administered by a health professional or carer, in spite of proper | C6.1   | Inappropriate timing of administration or dosing intervals |                                   | Drug use process                  |
|      |                                                                                                                                                             | C6.2   | Drug under-administered                                    |                                   |                                   |
|      |                                                                                                                                                             | C6.3   | Drug over-administered                                     |                                   |                                   |
|      |                                                                                                                                                             | C6.4   | Drug not administered at all                               |                                   |                                   |
|      |                                                                                                                                                             | C6.5   | Wrong drug administered                                    |                                   |                                   |

| Code            | Domains                                                                                                                                                                                | Code  | Problem/ Cause/ Intervention                                                       |                                                      |                                   |
|-----------------|----------------------------------------------------------------------------------------------------------------------------------------------------------------------------------------|-------|------------------------------------------------------------------------------------|------------------------------------------------------|-----------------------------------|
|                 |                                                                                                                                                                                        |       | Original version (V9.0)                                                            | Modified version for intervention                    | Modified version for consultation |
|                 | instructions (on the label)                                                                                                                                                            | C6.6  | Drug administered via wrong route                                                  |                                                      |                                   |
| C7 <sup>#</sup> | Patient related<br><br>The cause of the DRP can be related to the patient and his behavior (intentional or non-intentional)                                                            | C7.1  | Patient uses/takes less drug than prescribed or does not take the drug at all      | Drug-related adverse effects or drug-induced disease |                                   |
|                 |                                                                                                                                                                                        | C7.2  | Patient uses/takes more drug than prescribed                                       |                                                      |                                   |
|                 |                                                                                                                                                                                        | C7.3  | Patient abuses drug (unregulated overuse)                                          |                                                      |                                   |
|                 |                                                                                                                                                                                        | C7.4  | Patient uses unnecessary drug                                                      |                                                      |                                   |
|                 |                                                                                                                                                                                        | C7.5  | Patient takes food that interacts                                                  |                                                      |                                   |
|                 |                                                                                                                                                                                        | C7.6  | Patient stores drug inappropriately                                                |                                                      |                                   |
|                 |                                                                                                                                                                                        | C7.7  | Inappropriate timing or dosing intervals                                           |                                                      |                                   |
|                 |                                                                                                                                                                                        | C7.8  | Patient administers/uses the drug in a wrong way                                   |                                                      |                                   |
|                 |                                                                                                                                                                                        | C7.9  | Patient unable to use drug/form as directed                                        |                                                      |                                   |
|                 |                                                                                                                                                                                        | C7.10 | Patient unable to understand instructions properly                                 |                                                      |                                   |
| C8 <sup>#</sup> | Patient transfer related<br><br>The cause of the DRP can be related to the transfer of patients between primary, secondary and tertiary care, or transfer within one care institution. | C8.1  | No medication reconciliation at patient transfer                                   | Others, such as drug information                     |                                   |
|                 |                                                                                                                                                                                        | C8.2  | No updated medication list available                                               |                                                      |                                   |
|                 |                                                                                                                                                                                        | C8.3  | Discharge/transfer information about medication incomplete or missing              |                                                      |                                   |
|                 |                                                                                                                                                                                        | C8.4  | Insufficient clinical information about the patient                                |                                                      |                                   |
|                 |                                                                                                                                                                                        | C8.5  | Patient has not received necessary medication at discharge from hospital or clinic |                                                      |                                   |
| C9              | Other                                                                                                                                                                                  | C9.1  | No or inappropriate outcome monitoring (incl. TDM)                                 | /                                                    |                                   |
|                 |                                                                                                                                                                                        | C9.2  | Other cause; specify                                                               |                                                      |                                   |
|                 |                                                                                                                                                                                        | C9.3  | No obvious cause                                                                   |                                                      |                                   |
| Intervention    |                                                                                                                                                                                        |       |                                                                                    |                                                      |                                   |
| I0              | No intervention                                                                                                                                                                        | I0.1  | No intervention                                                                    | /                                                    |                                   |
| I1              | At prescriber level                                                                                                                                                                    | I1.1  | Prescriber informed only                                                           |                                                      |                                   |

| Code | Domains                        | Code   | Problem/ Cause/ Intervention           |                                                                                   |                                   |
|------|--------------------------------|--------|----------------------------------------|-----------------------------------------------------------------------------------|-----------------------------------|
|      |                                |        | Original version (V9.0)                | Modified version for intervention                                                 | Modified version for consultation |
|      |                                | I1.2   | Prescriber asked for information       |                                                                                   |                                   |
|      |                                | I1.3   | Intervention proposed to prescriber    |                                                                                   |                                   |
|      |                                | I1.4   | Intervention discussed with prescriber |                                                                                   |                                   |
|      |                                |        |                                        |                                                                                   |                                   |
| I2   | At patient level               | I2.1   | Patient (drug) counselling             |                                                                                   |                                   |
|      |                                | I2.2   | Written information provided (only)    |                                                                                   |                                   |
|      |                                | I2.3   | Patient referred to prescriber         |                                                                                   |                                   |
|      |                                | I2.4   | Spoken to family member/caregiver      |                                                                                   |                                   |
| I3   | At drug level                  | I3.1   | Drug changed to ...                    |                                                                                   |                                   |
|      |                                | I3.2   | Dosage changed to ...                  |                                                                                   |                                   |
|      |                                | I3.3   | Formulation changed to ...             |                                                                                   |                                   |
|      |                                | I3.4   | Instructions for use changed to ...    |                                                                                   |                                   |
|      |                                | I3.5   | Drug paused or stopped                 |                                                                                   |                                   |
|      |                                | I3.6   | Drug started                           |                                                                                   |                                   |
|      |                                | I3.7 * | /                                      | Needs adjustment on parenteral nutrition                                          |                                   |
|      |                                | I3.8 * | /                                      | Necessary frequency adjustment needed based on antibiotics' PK/PD characteristics |                                   |
| I4   | Other intervention or activity | I4.1   | Other intervention (specify)           |                                                                                   |                                   |
|      |                                | I4.2   | Side effect reported to authorities    |                                                                                   |                                   |

\* Being modified in intervention problems classification

# Being modified in consultation problems classification

**Supplementary Table 2. Top3 Medicines' Drug Related Problems and Causes of Pharmacy Intervention**

| <b>Problem</b>                                       | <b>Cause</b>                                                                                               | <b>N</b>   |
|------------------------------------------------------|------------------------------------------------------------------------------------------------------------|------------|
| <b><i>Antibiotic</i></b>                             |                                                                                                            | <b>286</b> |
| P1.1 No effect of drug treatment                     | C1.1 Inappropriate drug according to guidelines/formulary                                                  | 10         |
|                                                      | C3.2 Drug dose too high                                                                                    | 1          |
|                                                      | C9.1 No or inappropriate outcome monitoring (incl. TDM)                                                    | 1          |
| P1.2 Effect of drug treatment not optimal            | C1.1 Inappropriate drug according to guidelines/formulary                                                  | 16         |
|                                                      | C1.3 No indication for drug                                                                                | 1          |
|                                                      | C1.6 No or incomplete drug treatment in spite of existing indication                                       | 7          |
|                                                      | C1.7 Too many drugs prescribed for indication                                                              | 1          |
|                                                      | C1.8 Necessary genetic testing before drug initiation                                                      | 3          |
|                                                      | C3.1 Drug dose too low                                                                                     | 33         |
|                                                      | C3.2 Drug dose too high                                                                                    | 1          |
|                                                      | C3.3 Dosage regimen not frequent enough                                                                    | 30         |
|                                                      | C3.4 Dosage regimen too frequent                                                                           | 1          |
|                                                      | C6.1 Inappropriate timing of administration or dosing intervals                                            | 1          |
|                                                      | C9.1 No or inappropriate outcome monitoring (incl. TDM)                                                    | 4          |
| P1.3 Untreated symptoms or indication                | C1.6 No or incomplete drug treatment in spite of existing indication                                       | 8          |
|                                                      | C9.1 No or inappropriate outcome monitoring (incl. TDM)                                                    | 1          |
| P2.1 Adverse drug event (possibly) occurring         | C1.1 Inappropriate drug according to guidelines/formulary                                                  | 3          |
|                                                      | C1.2 Inappropriate drug (within guidelines but otherwise contraindicated)                                  | 12         |
|                                                      | C1.4 Inappropriate combination of drugs, or drugs and herbal medications, or drugs and dietary supplements | 1          |
|                                                      | C1.5 Inappropriate duplication of therapeutic group or active ingredient                                   | 2          |
|                                                      | C1.6 No or incomplete drug treatment in spite of existing indication                                       | 1          |
|                                                      | C1.7 Too many drugs prescribed for indication                                                              | 1          |
|                                                      | C1.8 Necessary genetic testing before drug initiation                                                      | 2          |
|                                                      | C3.2 Drug dose too high                                                                                    | 37         |
|                                                      | C4.2 Duration of treatment too long                                                                        | 4          |
|                                                      | C9.1 No or inappropriate outcome monitoring (incl. TDM)                                                    | 11         |
| P3.2 Unnecessary drug-treatment                      | C1.1 Inappropriate drug according to guidelines/formulary                                                  | 2          |
|                                                      | C1.2 Inappropriate drug (within guidelines but otherwise contraindicated)                                  | 1          |
|                                                      | C1.3 No indication for drug                                                                                | 8          |
|                                                      | C1.5 Inappropriate duplication of therapeutic group or active ingredient                                   | 6          |
|                                                      | C1.7 Too many drugs prescribed for indication                                                              | 1          |
|                                                      | C3.2 Drug dose too high                                                                                    | 2          |
|                                                      | C4.2 Duration of treatment too long                                                                        | 27         |
|                                                      | C9.1 No or inappropriate outcome monitoring (incl. TDM)                                                    | 1          |
| P3.3 Needs Supplementary drug therapeutic monitoring | C1.2 Inappropriate drug (within guidelines but otherwise contraindicated)                                  | 1          |
|                                                      | C1.8 Necessary genetic testing before drug initiation                                                      | 4          |
|                                                      | C3.2 Drug dose too high                                                                                    | 1          |

| <b>Problem</b>                                        | <b>Cause</b>                                                              | <b>N</b>  |
|-------------------------------------------------------|---------------------------------------------------------------------------|-----------|
| (TDM)                                                 | C4.2 Duration of treatment too long                                       | 1         |
|                                                       | C9.1 No or inappropriate outcome monitoring (incl. TDM)                   | 32        |
| P3.4 Antibiotics De-escalation                        | C1.1 Inappropriate drug according to guidelines/formulary                 | 5         |
|                                                       | C4.2 Duration of treatment too long                                       | 1         |
| <b><i>Parenteral nutrition</i></b>                    |                                                                           | <b>28</b> |
| P1.2 Effect of drug treatment not optimal             | C1.6 No or incomplete drug treatment in spite of existing indication      | 4         |
|                                                       | C3.2 Drug dose too high                                                   | 1         |
| P1.3 Untreated symptoms or indication                 | C1.6 No or incomplete drug treatment in spite of existing indication      | 3         |
| P2.1 Adverse drug event (possibly) occurring          | C1.1 Inappropriate drug according to guidelines/formulary                 | 1         |
|                                                       | C1.2 Inappropriate drug (within guidelines but otherwise contraindicated) | 4         |
|                                                       | C1.5 Inappropriate duplication of therapeutic group or active ingredient  | 1         |
|                                                       | C1.7 Too many drugs prescribed for indication                             | 1         |
|                                                       | C3.1 Drug dose too low                                                    | 2         |
|                                                       | C3.2 Drug dose too high                                                   | 2         |
| P3.1 Problem with cost-effectiveness of the treatment | C1.3 No indication for drug                                               | 1         |
|                                                       | C2.1 Inappropriate drug form (for this patient)                           | 1         |
| P3.2 Unnecessary drug-treatment                       | C1.3 No indication for drug                                               | 5         |
|                                                       | C4.2 Duration of treatment too long                                       | 2         |
| <b><i>Proton pump inhibitor</i></b>                   |                                                                           | <b>13</b> |
| P2.1 Adverse drug event (possibly) occurring          | C1.6 No or incomplete drug treatment in spite of existing indication      | 1         |
|                                                       | C3.2 Drug dose too high                                                   | 3         |
| P3.2 Unnecessary drug-treatment                       | C4.2 Duration of treatment too long                                       | 9         |

**Supplementary Table 3. Top3 Medicines' Drug Related Problems and Causes of Pharmacy Consultation**

| Problem                                      | Cause                                              | N          |
|----------------------------------------------|----------------------------------------------------|------------|
| <b><i>Antibiotic</i></b>                     |                                                    | <b>153</b> |
| P1.1 No effect of drug treatment             | C1 Drug selection                                  | 1          |
|                                              | C3 Dose selection                                  | 2          |
| P1.2 Effect of drug treatment not optimal    | C1 Drug selection                                  | 6          |
|                                              | C3 Dose selection                                  | 10         |
| P1.3 Untreated symptoms or indication        | C1 Drug selection                                  | 7          |
|                                              | C3 Dose selection                                  | 12         |
| P1.4 Other                                   | C3 Dose selection                                  | 1          |
| P2.1 Adverse drug event (possibly) occurring | C1 Drug selection                                  | 6          |
|                                              | C3 Dose selection                                  | 78         |
|                                              | C6 Drug use process                                | 3          |
|                                              | C7 Drug-related side effects/Drug-induced diseases | 9          |
|                                              | C8 Other                                           | 3          |
| P3 Treatment safety and cost-effectiveness   | C1 Drug selection                                  | 1          |
|                                              | C3 Dose selection                                  | 10         |
|                                              | C4 Treatment duration                              | 1          |
| P4 Other                                     | C3 Dose selection                                  | 1          |
|                                              | C4 Treatment duration                              | 1          |
|                                              | C6 Drug use process                                | 1          |
| <b><i>Antifungal drugs</i></b>               |                                                    | <b>21</b>  |
| P1.2 Effect of drug treatment not optimal    | C3 Dose selection                                  | 1          |
| P1.3 Untreated symptoms or indication        | C1 Drug selection                                  | 3          |
|                                              | C3 Dose selection                                  | 4          |
|                                              | C8 Other                                           | 1          |
| P1.4 Other                                   | C4 Treatment duration                              | 1          |
| P2.1 Adverse drug event (possibly) occurring | C1 Drug selection                                  | 2          |
|                                              | C3 Dose selection                                  | 4          |
|                                              | C7 Drug-related side effects/Drug-induced diseases | 3          |
| P4 Other                                     | C3 Dose selection                                  | 1          |
|                                              | C8 Other                                           | 1          |
| <b><i>Antiepileptic drugs</i></b>            |                                                    | <b>9</b>   |
| P1.2 Effect of drug treatment not optimal    | C3 Dose selection                                  | 3          |
| P1.3 Untreated symptoms or indication        | C3 Dose selection                                  | 1          |
| P2.1 Adverse drug event (possibly) occurring | C3 Dose selection                                  | 2          |
| P4 Other                                     | C3 Dose selection                                  | 1          |
|                                              | C8 Other                                           | 2          |
